# Supplementary material
Source: HighWire-hosted journal article supplement (http://cmajopen.ca/highwire/filestream/81189/field_highwire_adjunct_files/1/2018-0090-1-at.pdf)
Supplement: 2018-0090-1-at.pdf [file 2018-0090-1-at.pdf]

**Appendix 1 (as supplied by the authors): Supplementary File**

| <b>Discovered By</b>                   | <b>Number of QREs (N)</b> | <b>Proportion of QREs (%)</b> |
|----------------------------------------|---------------------------|-------------------------------|
| Pharmacist                             | 73,739                    | 75.17%                        |
| Pharmacy Technician/Assistant          | 10,094                    | 10.29%                        |
| Pharmacy Student                       | 730                       | 0.74%                         |
| Patient                                | 9,728                     | 9.92%                         |
| Physician                              | 502                       | 0.51%                         |
| Nurse                                  | 1,432                     | 1.46%                         |
| Patient's Family Member/Relative       | 1,283                     | 1.31%                         |
| Paramedic                              | 2                         | 0.00%                         |
| Dentist                                | 6                         | 0.01%                         |
| CCAC Home Care Coordinator             | 24                        | 0.02%                         |
| Other                                  | 182                       | 0.19%                         |
| Social Worker                          | 2                         | 0.00%                         |
| Patient's Friend/Visitor               | 28                        | 0.03%                         |
| Patient's Caregiver/Home Aid/Assistant | 327                       | 0.33%                         |
| Veterinarian                           | 11                        | 0.01%                         |
| Respiratory Therapist                  | 1                         | 0.00%                         |
| Medical Student                        | 4                         | 0.00%                         |
| Nursing Student                        | 1                         | 0.00%                         |
| Occupational Therapist                 | 1                         | 0.00%                         |
| <b>Total</b>                           | <b>98,097</b>             | <b>100.00%</b>                |

**Supplemental 1. Number of QREs by discoverer.**

(N is the total number and % is the percentage)

(QRE is quality related event)
